# Supplementary material for: Doubly protected ester prodrug of 5-aminolevulinic acid for enhanced cell uptake and photoinactivation
Source: Research Square preprint supplement (doi:10.21203/rs.3.rs-9033698/v1), 2026-04-09
Supplement: Supplementary file 1 [file b1fd880cd51b7e706c275030.pdf]

*Electronic Supplementary Information for:*

**Doubly protected ester prodrug of 5-aminolevulinic acid for enhanced cell uptake and  
photoinactivation**

Hailey S. Sanders, Karolina A. Rooney, Marissa A. Panethiere, Kirk M. Atkinson, and Bradley D. Smith\*

Department of Chemistry and Biochemistry,  
University of Notre Dame,  
Notre Dame, Indiana  
46556, USA

\*E-mail: [smith.115@nd.edu](mailto:smith.115@nd.edu)

## Compound Spectra

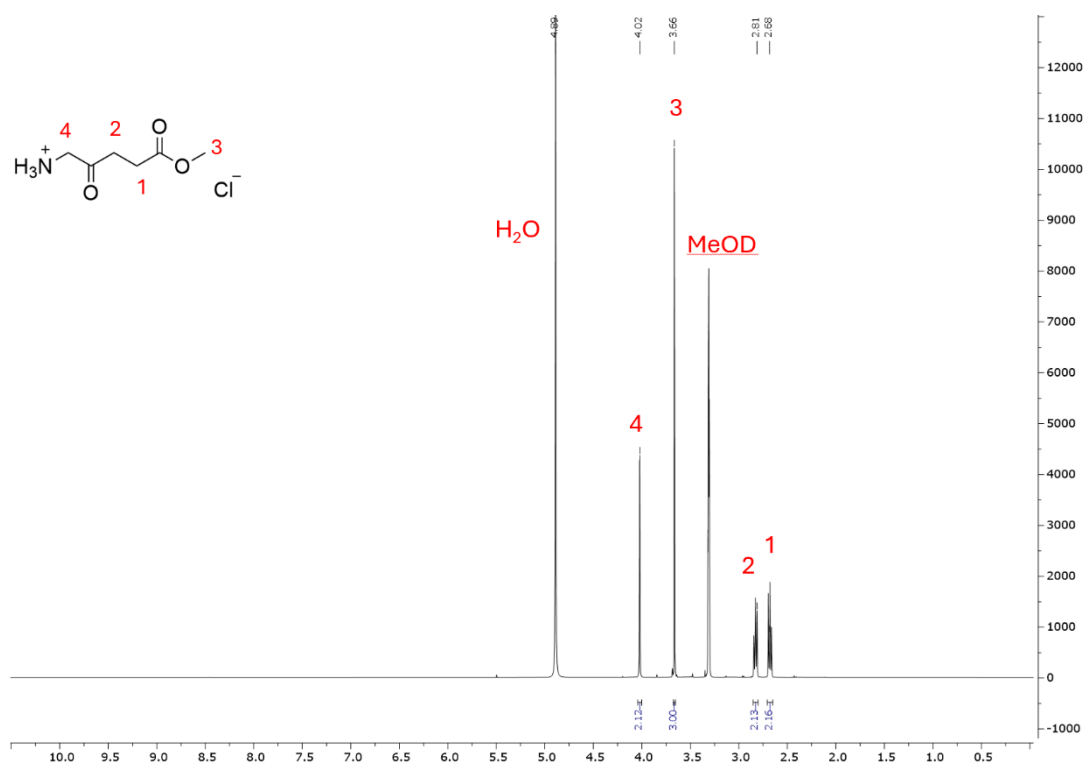

$^1\text{H NMR}$  (400 MHz, MeOD) of MAL

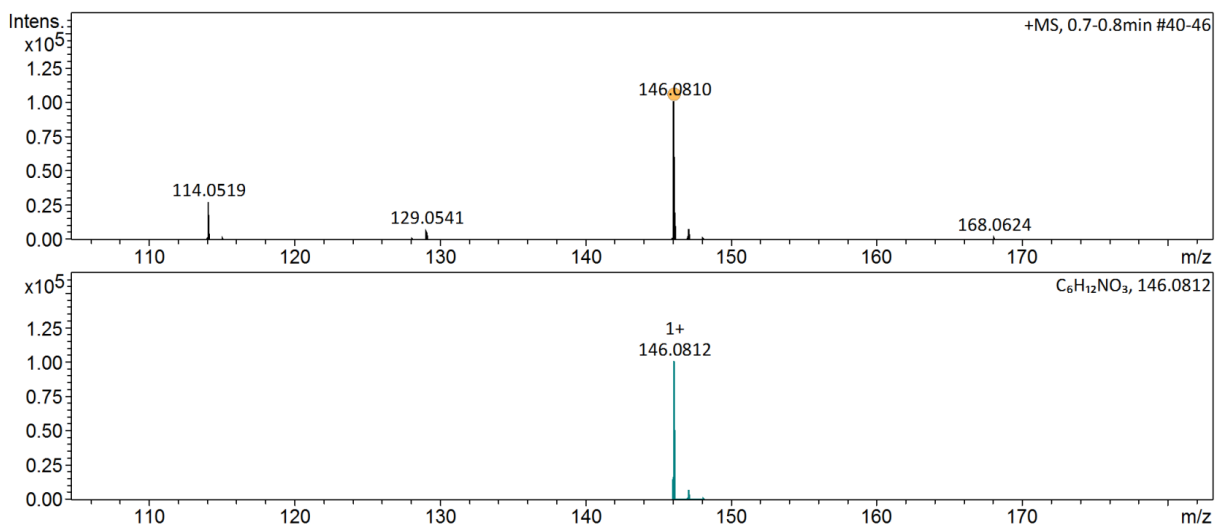

HRMS (SI-TOF) spectrum of MAL



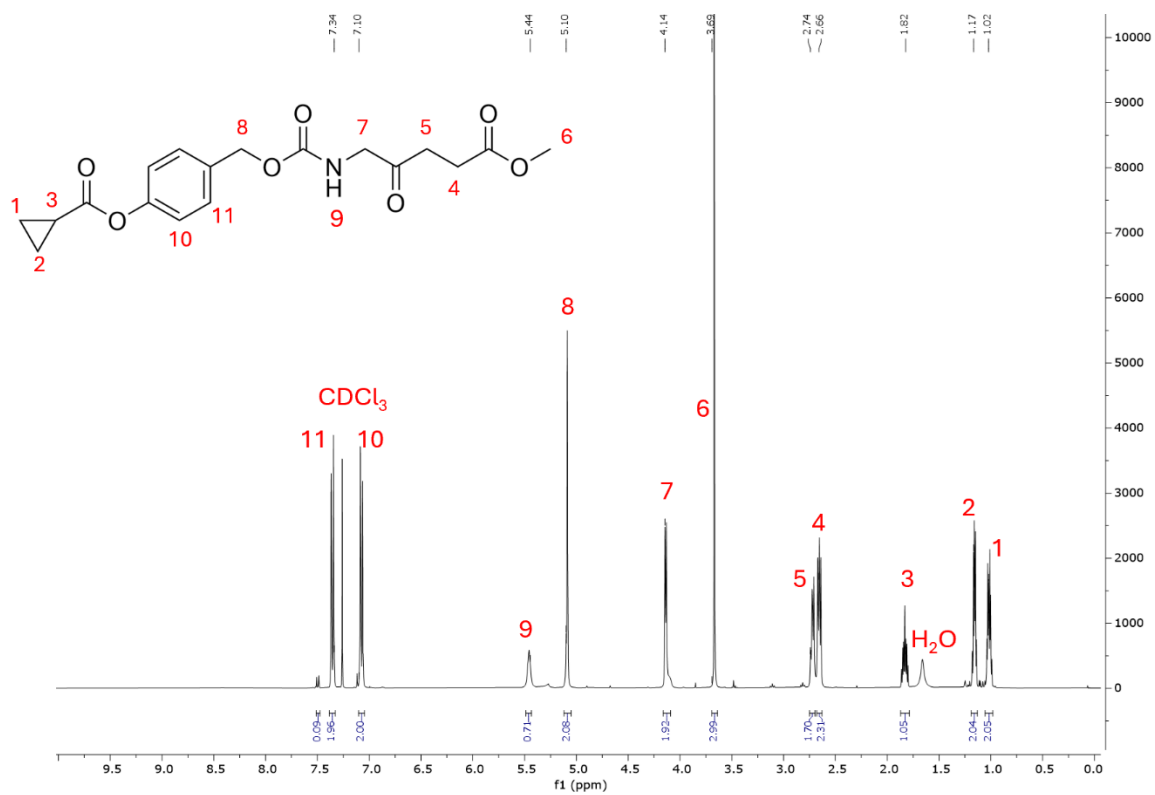

<sup>1</sup>H NMR (400 MHz, CDCl<sub>3</sub>) of 5-eMAL

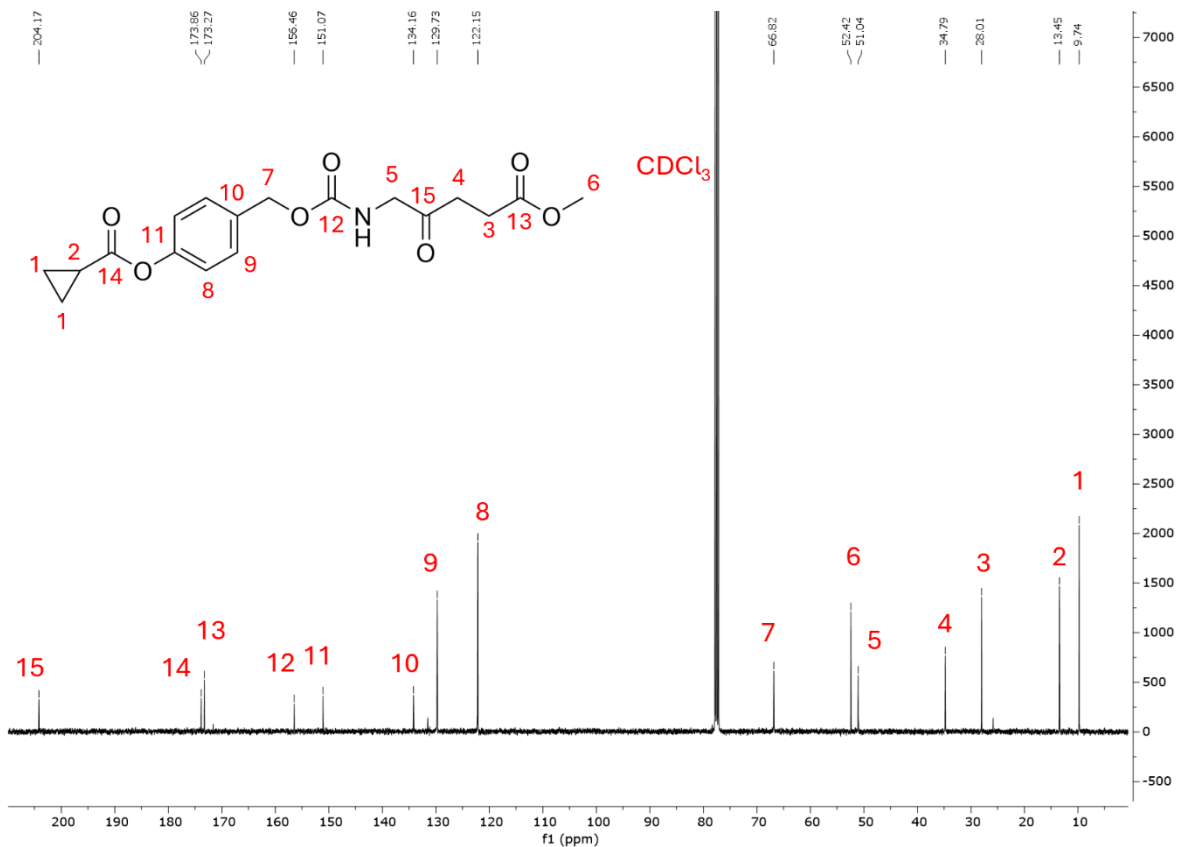

$^{13}\text{C}$  NMR (400 MHz,  $\text{CDCl}_3$ ) of 5-eMAL

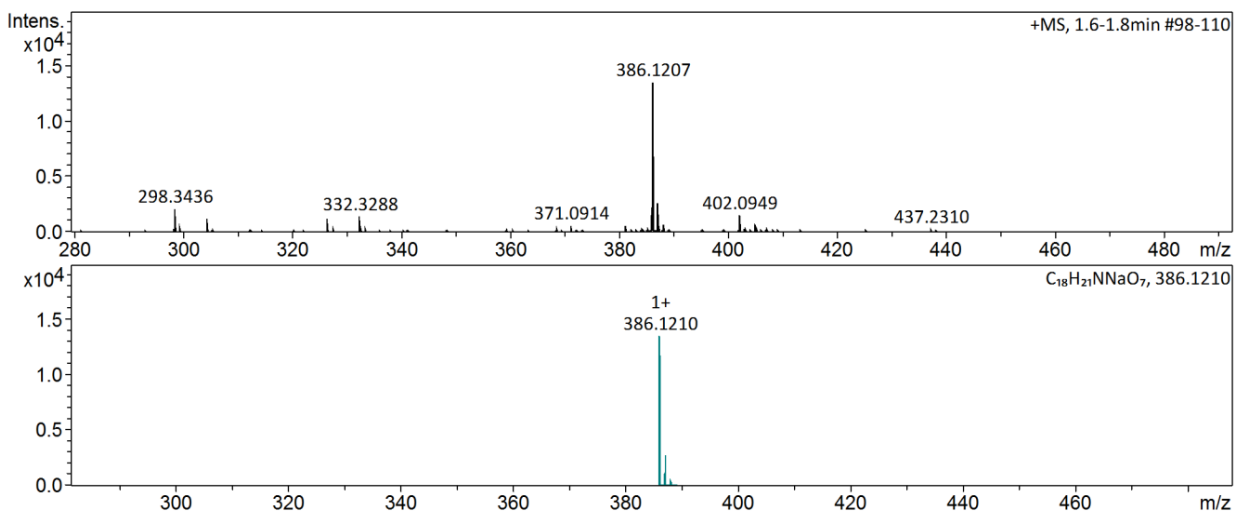

HRMS (ESI-TOF) spectrum of 5-eMAL

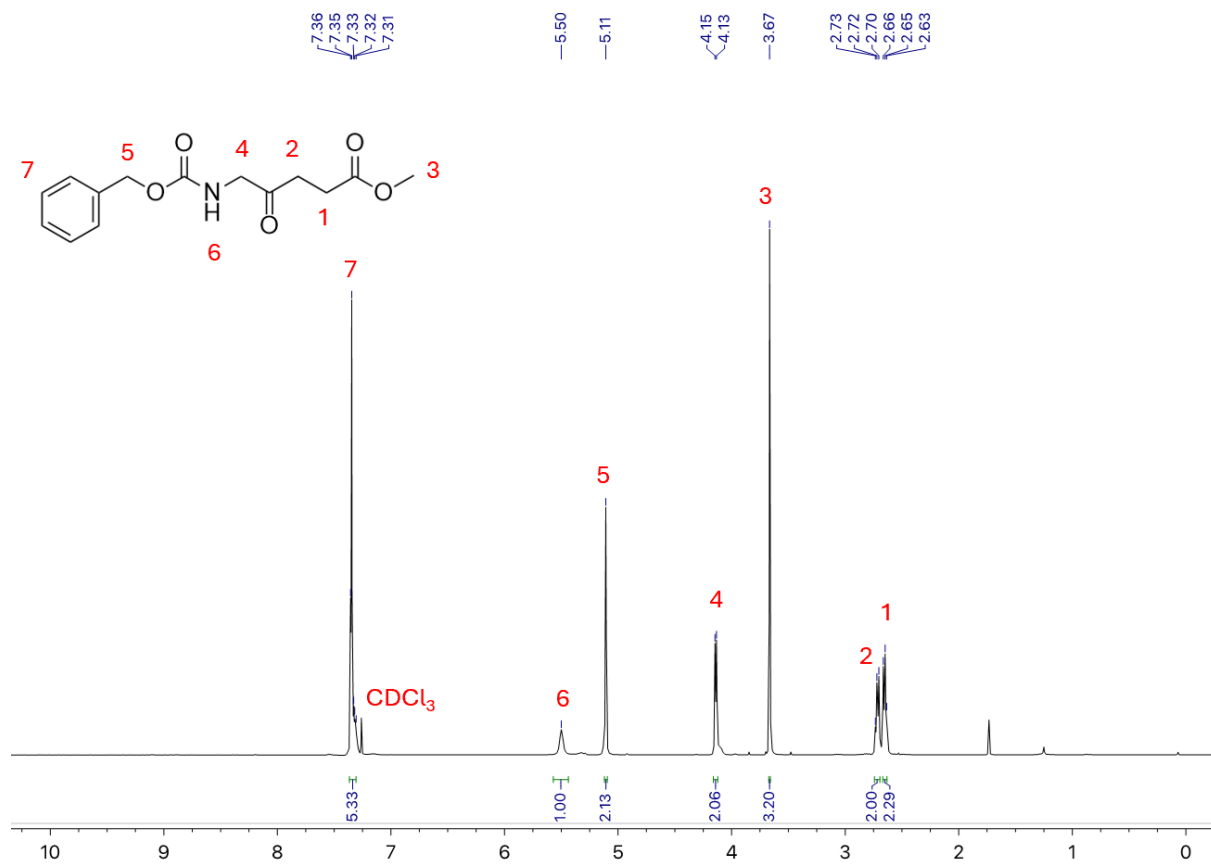

$^1\text{H}$  NMR spectrum (400 MHz,  $\text{CDCl}_3$ ) of **5-bMAL**

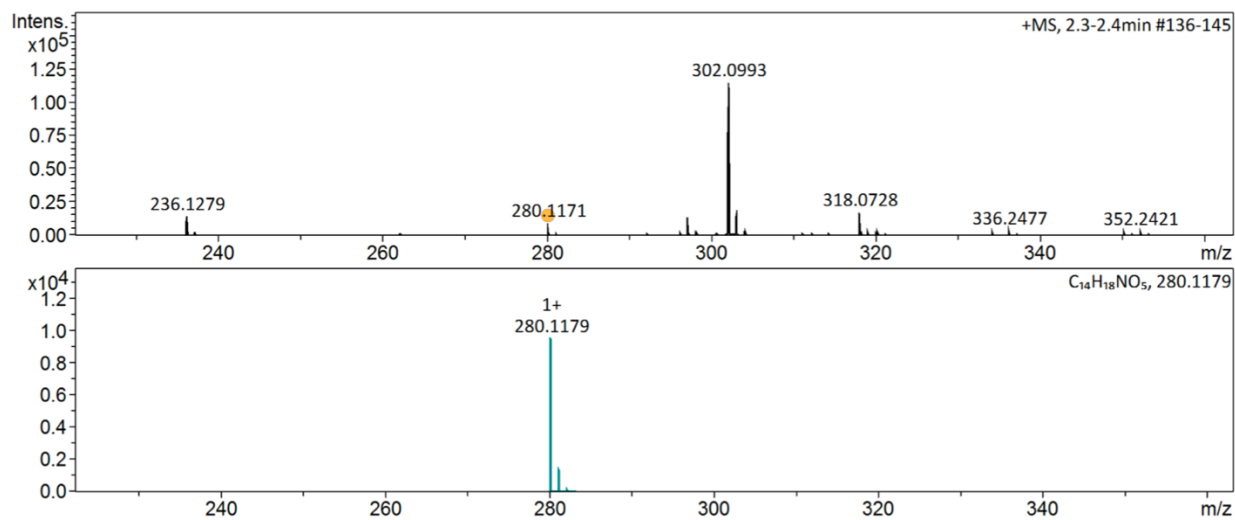

HRMS (ESI-TOF) spectrum of **5-bMAL**

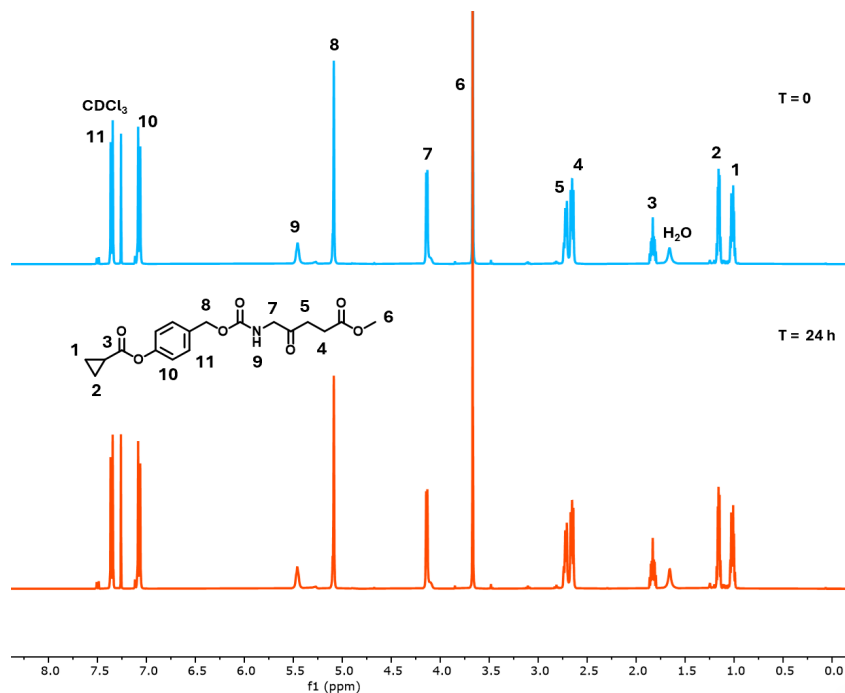

**Scheme S1:** <sup>1</sup>H NMR spectrum (400 MHz, CDCl<sub>3</sub>, 25°C) showing that a solution of 5-eMAL is stable over 24 hours at room temperature.

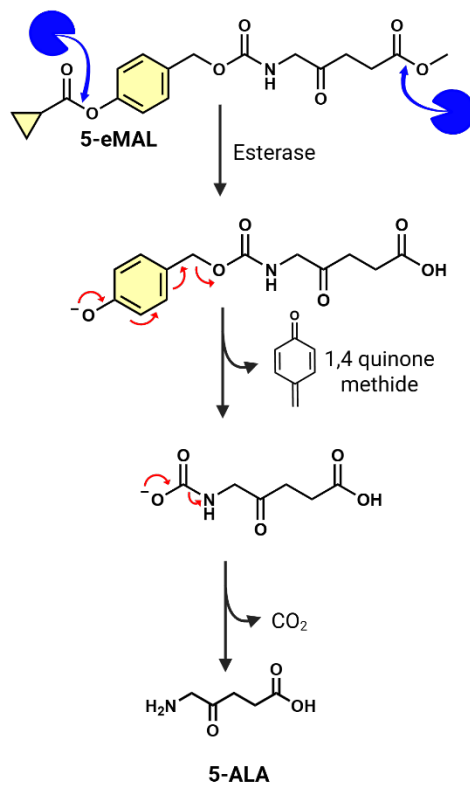

**Scheme S2:** Esterase triggered conversion of 5-eMAL into 5-ALA.

## Biological Controls

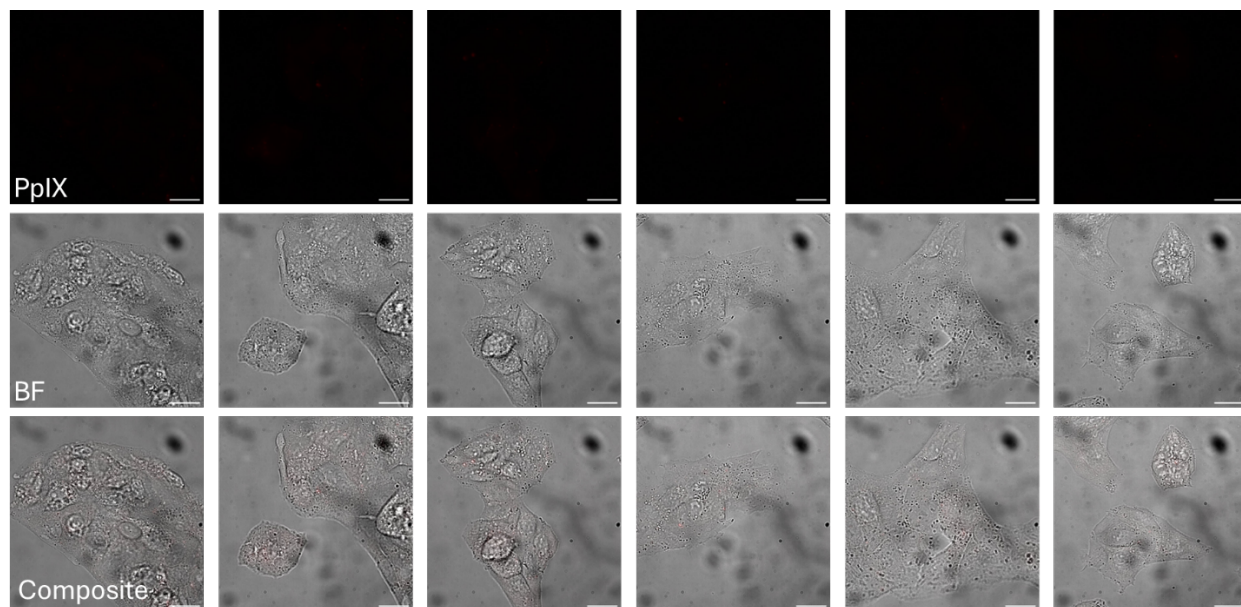

**Figure S1:** Micrographs of untreated HepG2 cells. Ex: 387/11 nm; Dichromatic mirror: 409 nm; Em: 655/40 nm. Scale Bar = 30  $\mu$ m.

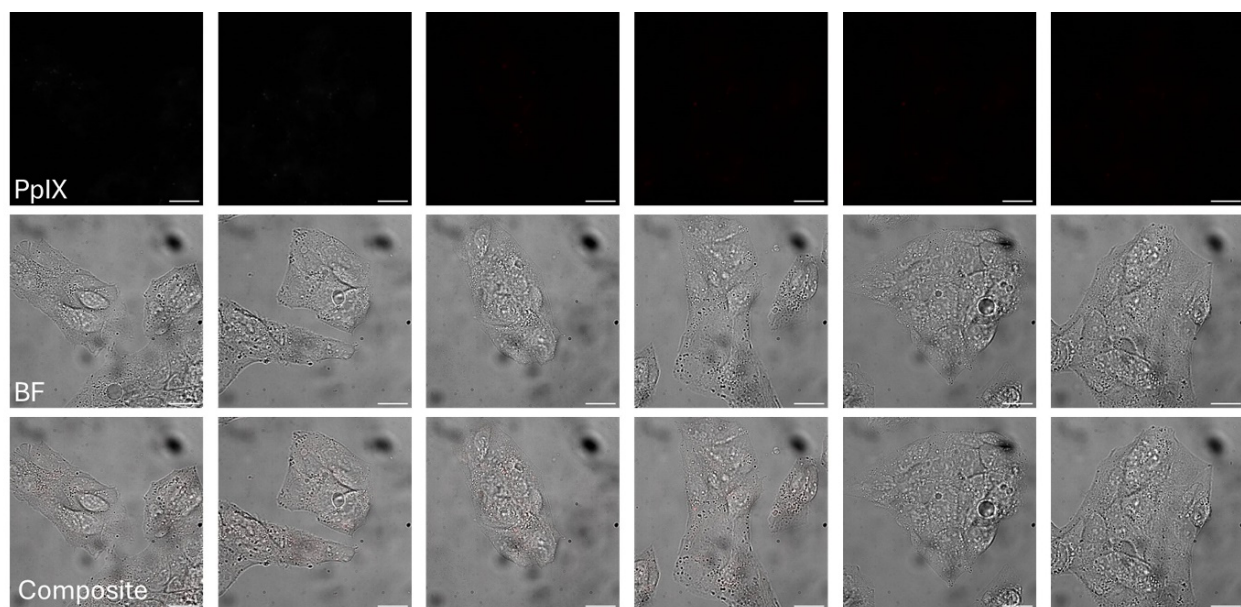

**Figure S2:** Micrographs of HepG2 cells incubated three hours with 5-ALA (5  $\mu$ M). Ex: 387/11 nm; Dichromatic mirror: 409 nm; Em: 655/40 nm. Scale Bar = 30  $\mu$ m.

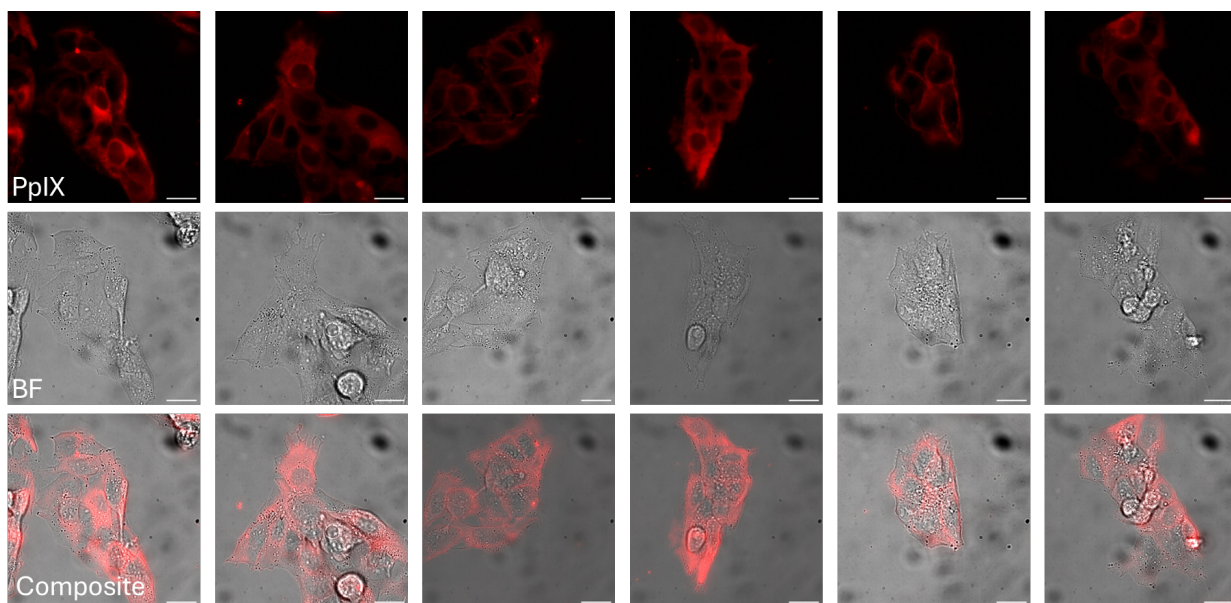

**Figure S3:** Micrographs of HepG2 cells incubated three hours with 5-eMAL (5  $\mu$ M). Ex: 387/11 nm; Dichromatic mirror: 409 nm; Em: 655/40 nm. Scale Bar = 30  $\mu$ m.

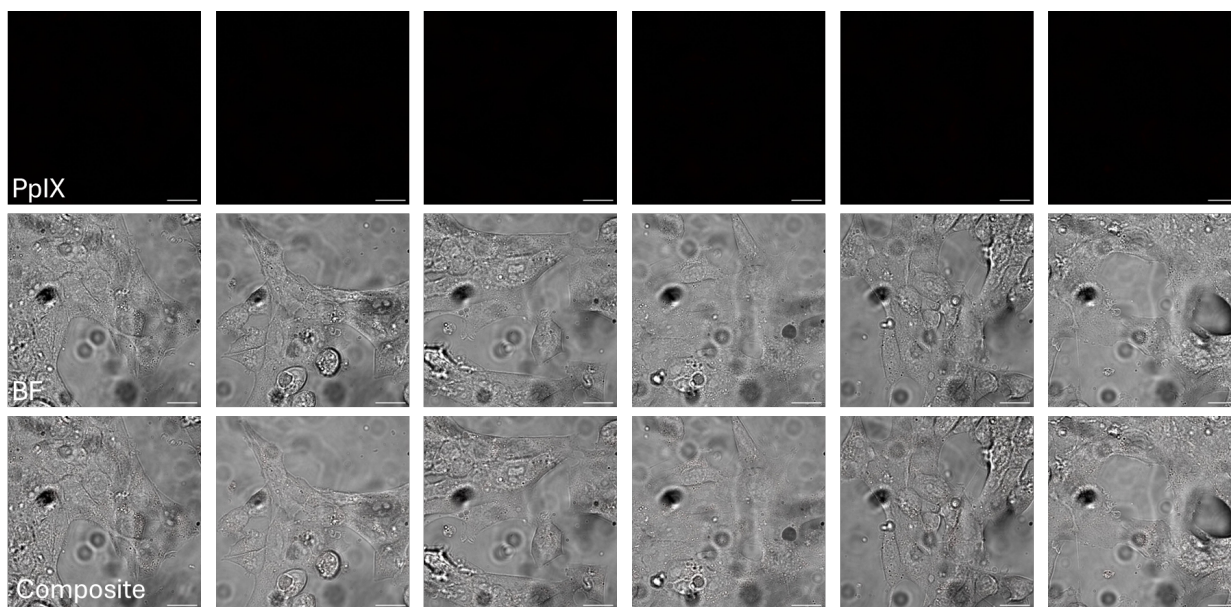

**Figure S4:** Micrographs of untreated 4T1 cells. Ex: 387/11 nm; Dichromatic mirror: 409 nm; Em: 655/40 nm. Scale Bar = 30  $\mu$ m.

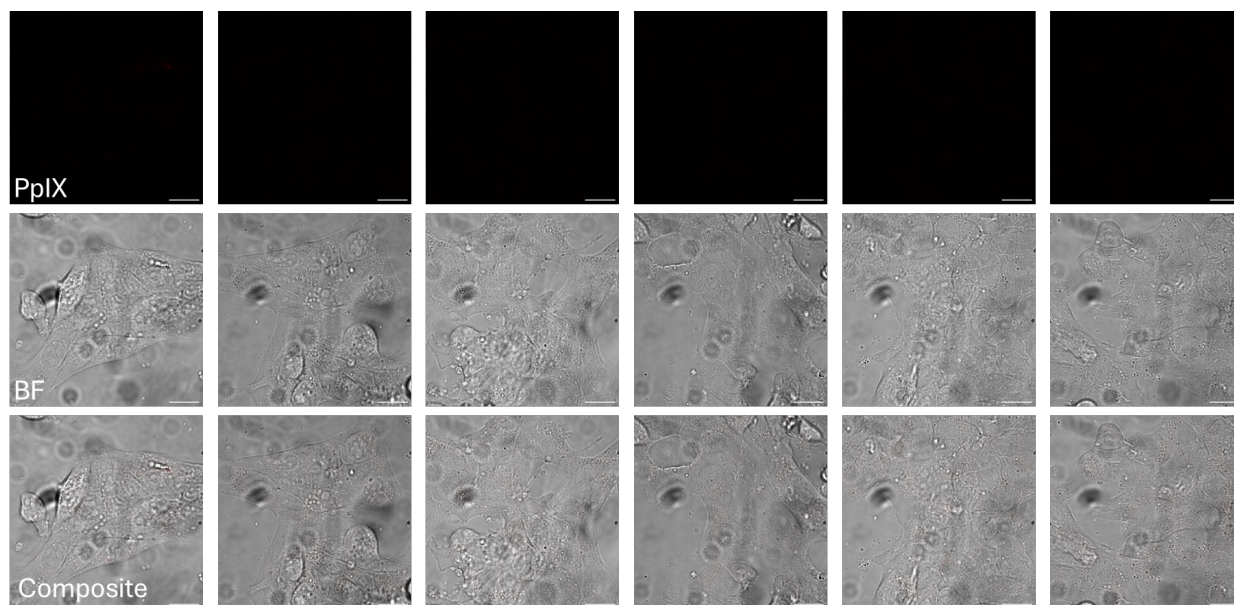

**Figure S5:** Micrographs of 4T1 cells incubated three hours with 5-ALA (5  $\mu$ M). Ex: 387/11 nm; Dichromatic mirror: 409 nm; Em: 655/40 nm. Scale Bar = 30  $\mu$ m.

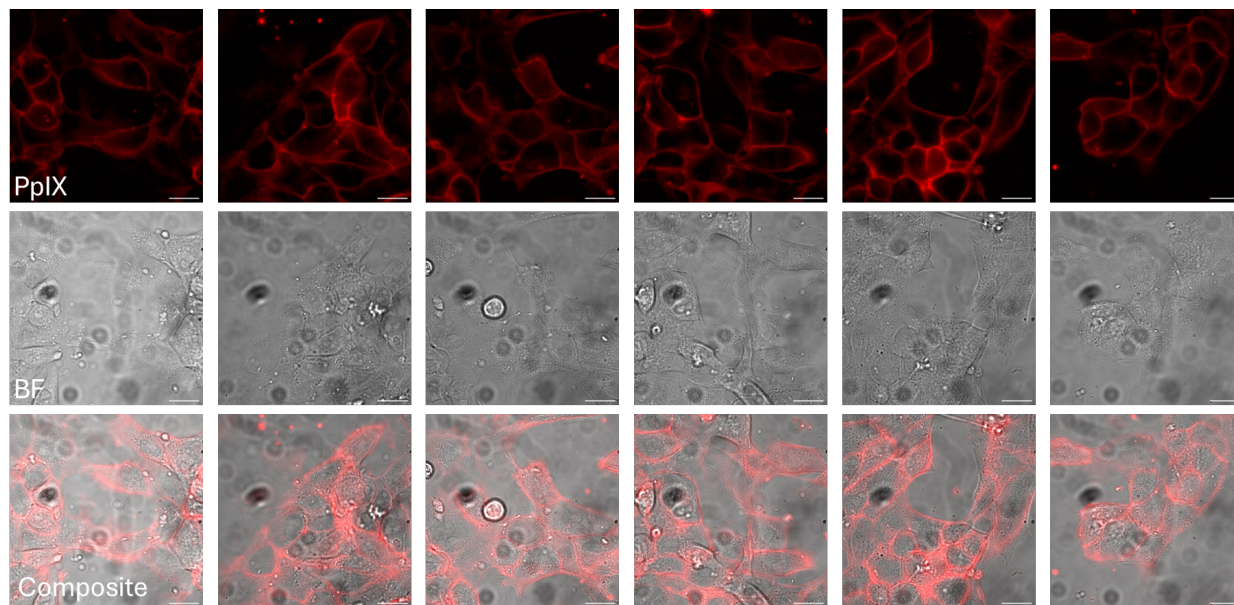

**Figure S6:** Micrographs of 4T1 cells incubated three hours with 5-eMAL (5  $\mu$ M). Ex: 387/11 nm; Dichromatic mirror: 409 nm; Em: 655/40 nm. Scale Bar = 30  $\mu$ m.

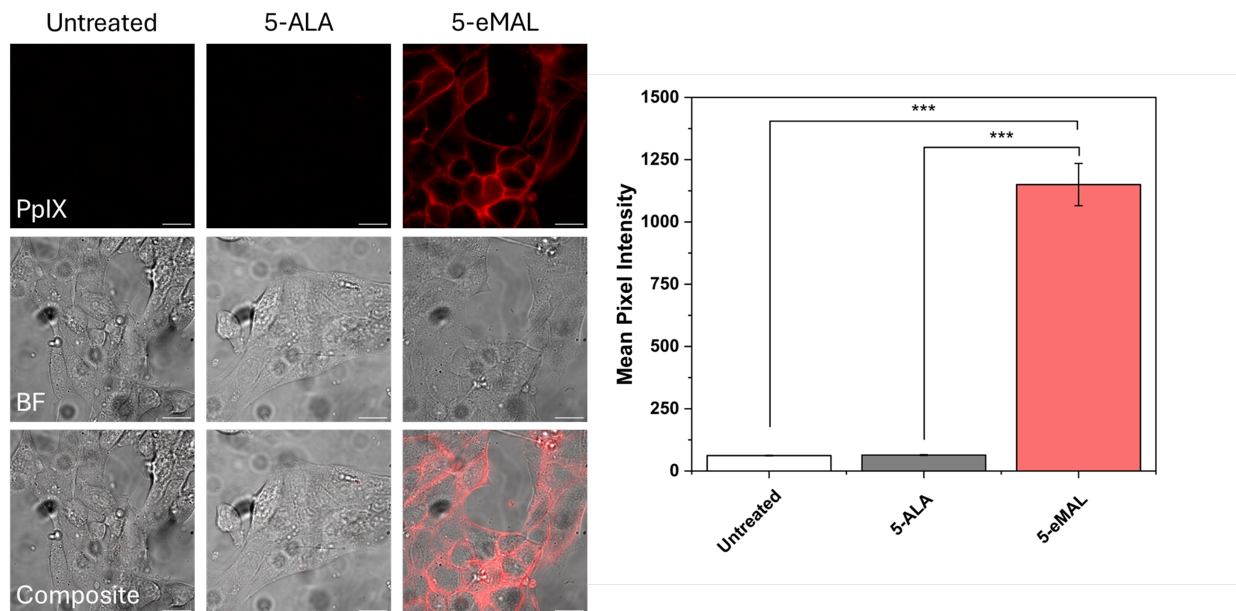

**Figure S7:** (a) Representative micrographs of 4T1 cells left untreated, incubated three hours with 5-ALA (5  $\mu$ M), or incubated three hours with 5-eMAL (5  $\mu$ M). (b) Average mean pixel intensity of 4T1 cells. Bars represent standard error (N = 6). \*\*\*  $p < 0.001$ . Ex: 387/11 nm; Dichromatic mirror: 409 nm; Em: 655/40 nm. Scale bar = 30  $\mu$ m.

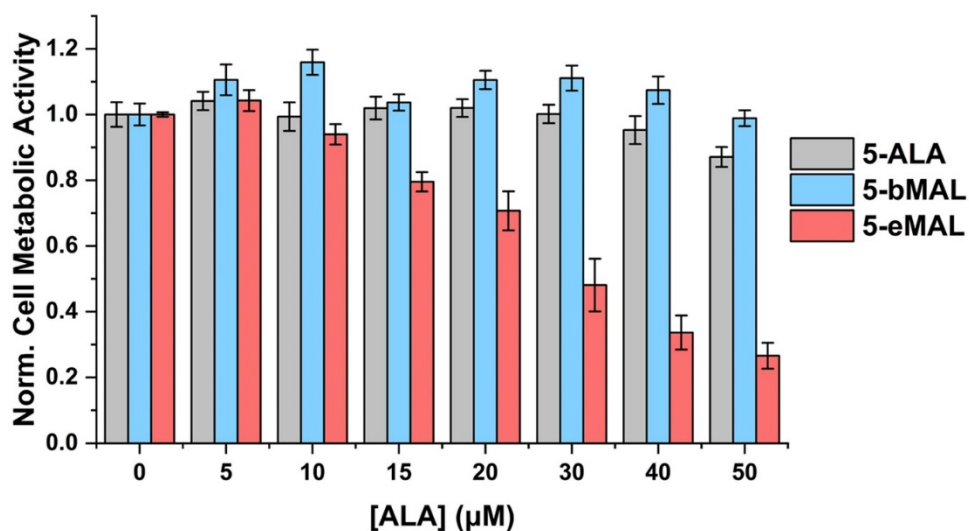

**Figure S8:** Normalized metabolic activity of HepG2 cells incubated 24 hours with either 5-ALA, 5-eMAL, or 5-bMAL (0 – 50  $\mu$ M) in dark. Bars represent standard error of one experiment where N = 3 replicates of the same concentration.

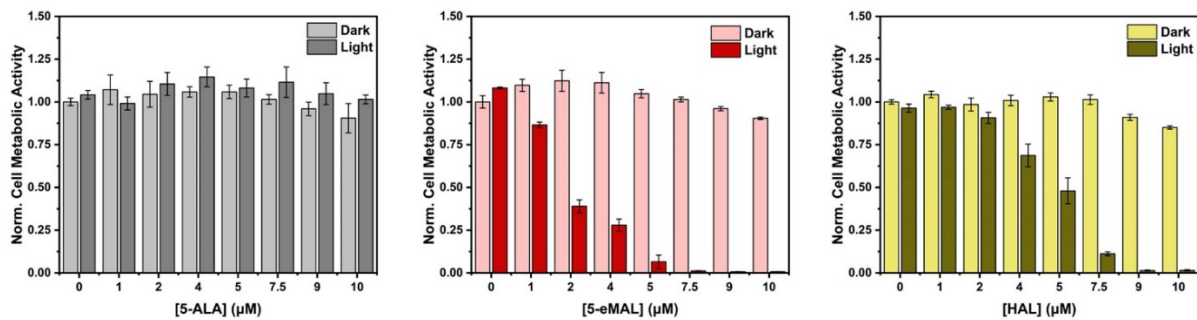

**Figure S9:** Normalized metabolic activity of HepG2 cells incubated 3 hours with 5-ALA, 5-eMAL, or HAL (0 – 10  $\mu\text{M}$ ) and kept in dark or cells incubated 3 hours with 5-ALA, 5-eMAL, or HAL (0 – 10  $\mu\text{M}$ ) and then irradiated with 405 nm light (6 mW) for 10 minutes. Bars represent error where N = 3.

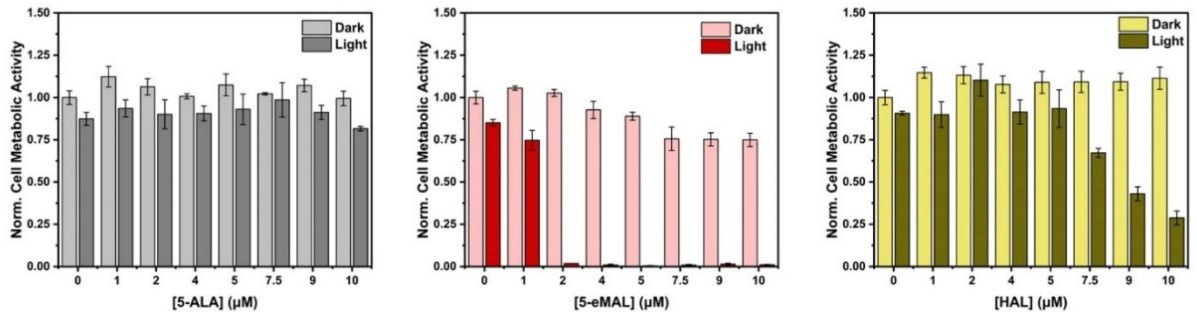

**Figure S10:** Normalized metabolic activity of 4T1 cells incubated 3 hours with 5-ALA, 5-eMAL, or HAL (0 – 10  $\mu\text{M}$ ) and kept in dark or cells incubated 3 hours with 5-ALA, 5-eMAL, or HAL (0 – 10  $\mu\text{M}$ ) and then irradiated with 405 nm light (6 mW) for 10 minutes. Bars represent error where N = 3.
